# Supplementary material
Source: PubMed Central journal article supplement (PMC3017208)
Supplement: 1009830108_pnas.1009830108_SI.pdf [file 1009830108_pnas.1009830108_SI.pdf]

# Supporting Information

Yang et al. 10.1073/pnas.1009830108

## SI Materials and Methods.

**Cell Culture.** 293T and 293FT cells were from American Type Culture Collection (ATCC) and maintained in DMEM supplemented with 10% (vol/vol) fetal bovine serum (Hyclone). For generation of viruses, cells were seeded a day before transfection. The mouse myoblast cell line C2C12 was obtained from ATCC and maintained at less than 60% confluence in DMEM containing 15% (vol/vol) fetal bovine serum (growth medium) at 37 °C with 5% CO<sub>2</sub>. To induce differentiation into myotubes, cells were incubated in DMEM containing 2% (vol/vol) horse serum (differentiation medium) when they reached 80% confluence. All media were supplemented with 1% penicillin and streptomycin.

**Plasmids and Stable Cell Lines.** H3.1 or H3.3 fused with Flag-HA in the C terminus (eH3) was prepared from pOZ H3.1 and H3.3 (gift from Dr. Y. Nakatani, Dana-Farber Cancer Institute, Boston, MA), respectively. The eH3s were cloned into pBABE puro. To produce stable cell lines, cloned DNA was used for transfection with a retroviral packaging system into 293T cells. After 36 h, retrovirus-containing medium was collected, filtered (0.45 μm), and applied to C2C12 cells with 5 μg/mL of polybrene (Sigma). Cells were then selected in medium containing puromycin (2.5 μg/mL, Sigma). A clone that expresses eH3 at about 10% of the level of endogenous H3 was selected for each. To generate HIRA shRNA or Asf1b shRNA stable cells, a pLKO1 shRNA construct was transfected into 293FT cells with the lentiviral packaging vectors (pLP1, pLP2, and pLP-VSVG) to produce lentiviruses. Recovered virus solution was used for infection of C2C12 cells (selection with puromycin). Knockdown efficiency of endogenous target genes was monitored by immunoblotting and RT-PCR. In case of shHIRA expressing cells, to avoid clonal bias with exacerbated differentiation phenotype, puromycin resistant clones with affected HIRA expression were pooled together and maintained in the growth medium. Cells with stable expression of shAsf1b showed no difference in proliferation and differentiation compared to control shRNA cells. For a complementation experiment, HA-human HIRA was amplified from pcDNA HA-HIRA by PCR and was cloned into pBABE hygromycin vector to use for infection of shHIRA C2C12 cells. After culture in the medium with hygromycin (200 μg/mL, Sigma) independent three clones were isolated and checked for human HIRA expression.

**RNA interference.** Transfection of siRNA was performed using Lipofectamine 2000 (Invitrogen) according to the manufacturer's instructions. The siRNAs were purchased from either Invitrogen or Samchully Pharm. The shRNA constructs were purchased from Open Biosystems. The target sequences of siRNA and shRNA were as follows: mHIRA shRNA; 5' CTC AAG CTG ATG ATC GAA GTT 3', mHIRA siRNA-1 (used in Fig. 3B, Fig. S4 B and C, and Fig. S7B); 5' GAC CAA GTT TGC AAC TGG AGG ACA A 3', mHIRA siRNA-2 (used in Fig. 3C, Fig. S2D, and Fig. S4B); 5' CCG GAA AGC TGT GAC TGT TGT GAA A 3', mAsf1a siRNA; 5' GGC ATA TGT TTG TGT TTC AGG CTG A 3', mAsf1b shRNA; 5' TGT GGG CTA CTA TGT CAA CAA 3', mCHD1 siRNA; 5' ACA TTA TGA TGG AGC TAA A 3', mH3.3a siRNA-1; 5' TGA AGA AAC CTC ATC GTT A 3', mH3.3a siRNA-2; 5' GAG AAA TTG CTC AGG ACT T 3', mH3.3b siRNA; 5' CAG AGA TTG GTG AGG GAG A 3'.

**RNA Extraction and quantitative RT-PCR (qRT-PCR).** Total RNA was purified using TRIzol reagent (Invitrogen) according to the manufacturer's instructions. One microgram of RNA was reverse transcribed with cDNA synthesis kit (Promega). Real-time PCR was performed using the CFX96 System (BioRad). PCR amplification was carried out using KAPA SYBR FAST Master Mix (KAPA Biosystem) and relative quantification was done with the 2<sup>-CT</sup> (Livak) method. The sequences of primers used for RT-PCR are listed in Table S1.

**Chromatin Immunoprecipitation.** C2C12 cells were cross-linked with 1% formaldehyde at 37 °C for 15 min. Crosslinking was quenched by addition of 0.125 M glycine for 5 min. Cells were washed with PBS and nuclei were isolated with Lysis buffer A [10 mM Tris HCl (pH 7.5), 10 mM KCl, 5 mM MgCl<sub>2</sub>, 0.5% NP40], resuspended in SDS lysis buffer [50 mM Tris HCl (pH 7.9), 10 mM EDTA, 0.5% SDS], and sonicated at 0 °C to produce DNA fragments ranging between 200 and 1,000 bp using the Bioruptor (Cosmo Bio). After centrifugation, antibodies and beads were added to the chromatin samples and incubated overnight at 4 °C with rotation. After washing and de-cross-linking, DNA was purified using a PCR purification kit (Qiagen). The relative amount of immunoprecipitated DNA was represented as the percentage of input DNA (IP DNA/input).

**Microarray Analysis.** RNA was prepared with RNeasy Plus Mini kit (Qiagen). RNA purity and integrity were evaluated by denaturing gel electrophoresis, OD 260/280 ratio, and analysis on Agilent 2100 Bioanalyzer (Agilent Technologies). The array signal was detected using Amersham fluorolink streptavidin-Cy3 (GE Healthcare Bio-Sciences) and scanned with an Illumina bead array reader confocal scanner. Array data export processing and analysis was performed using Illumina BeadStudio v3.1.3 (Gene Expression Module v3.3.8).

**Fusion Index.** Differentiated cells were immunocytochemically stained with MHC (myosin heavy chain) antibody and then cell fusion was measured by calculating the percentage of nuclei positioning in a consecutive manner in MHC-positive cells.

**Chromatin Accessibility Assay.** Nuclei isolated from C2C12 cells were resuspended in 1× reaction buffer and incubated with different units of either *Pvu*II or micrococcal nuclease (New England Biolabs) at 37 °C. Samples were phenol-extracted and ethanol-precipitated and subjected to real-time PCR analysis. Each sample was normalized to nondigested input control.

**Immunoblot Analysis of Histones.** For detection of histones, cell lysates were briefly sonicated with Bioruptor (Cosmo Bio) to release histones from chromatin. Equal amounts of protein (20–50 μg) were separated on 15% SDS-PAGE gel and transferred onto 0.2-μm nitrocellulose membranes. The membranes were blocked with 5% skim milk and incubated with primary antibodies diluted in the range of 1:10,000–1:1,000. After wash with TBST [5 mM Tris HCl (pH 7.4), 150 mM NaCl, 0.01% Tween 20], secondary antibodies were added and incubated for 1 h at RT. Signals were visualized by ECL detection (Abfrontier).

**Immunoprecipitation.** Cells were harvested and lysed in NETN buffer [25 mM Tris HCl (pH 8.0), 1 mM EDTA, 150 mM NaCl, 0.5% (vol/vol) NP40] containing protease inhibitors. Following brief sonication and clarification, anti-FLAG antibody was added









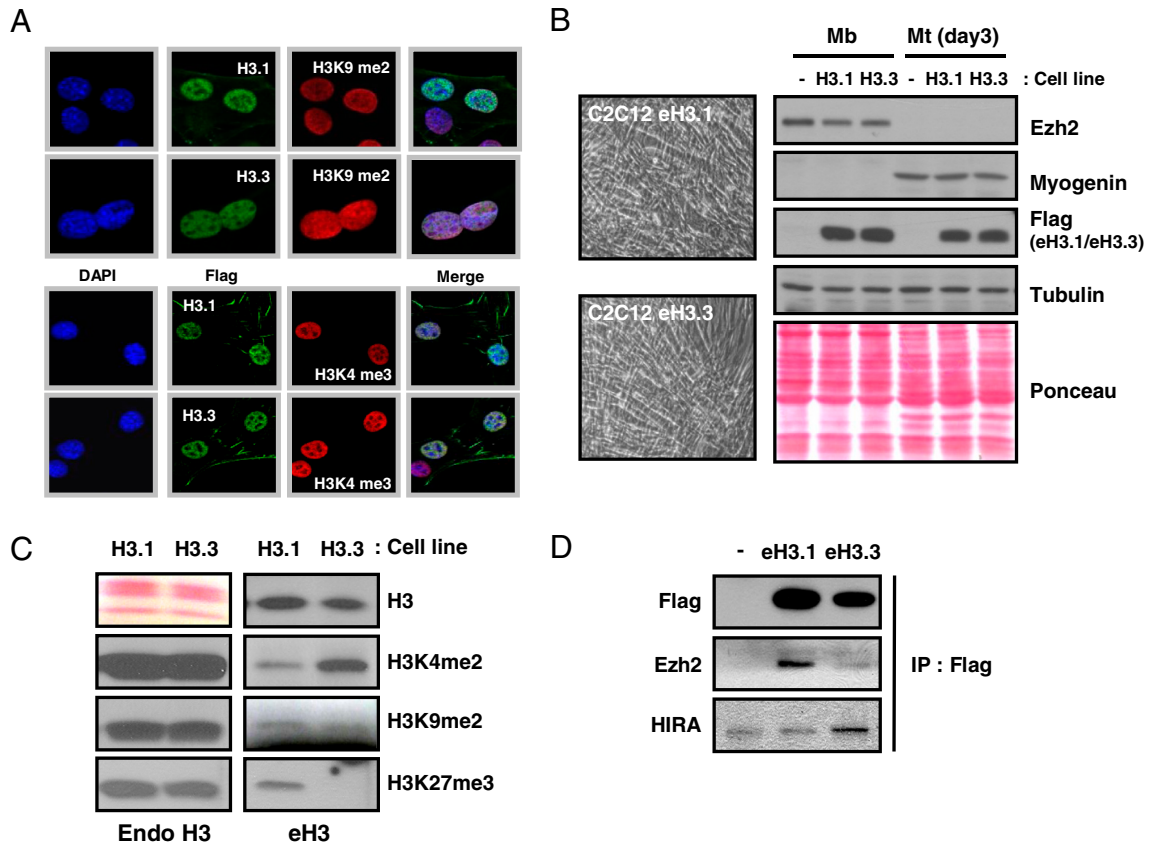

**Fig. 56.** Epitope-tagged H3 (eH3) C2C12 cells differentiate normally. (A) C2C12 myoblasts stably expressing Flag-H3.1 or H3.3 were stained with anti-FLAG, anti-H3K9me, or anti-H3K4me. eH3 was appropriately localized in nucleus and did not perturb distribution patterns of methylated H3. (B) ctl and eH3 C2C12 cells were differentiated for 3 d, and the efficiency of myogenic differentiation was monitored by examining the expression patterns of Ezh2 (myoblast specific) and myogenin (myotubes specific). Myotube formation (*Left*) and the levels of Ezh2 and myogenin (*Right*) were evaluated by phase contrast microscopy and immunoblotting, respectively. (C) Posttranslational modifications of endogenous H3 and FLAG-HA tagged H3 (eH3, ~20 KDa) in eH3.1- or eH3.3-expressing C2C12 cells were analyzed by immunoblotting with the indicated antibodies. Total histones were visualized by Ponceau stain. (D) Cell extracts prepared from eH3 C2C12 cells were immunoprecipitated with anti-FLAG antibody and then subjected to immunoblotting with the indicated antibodies.

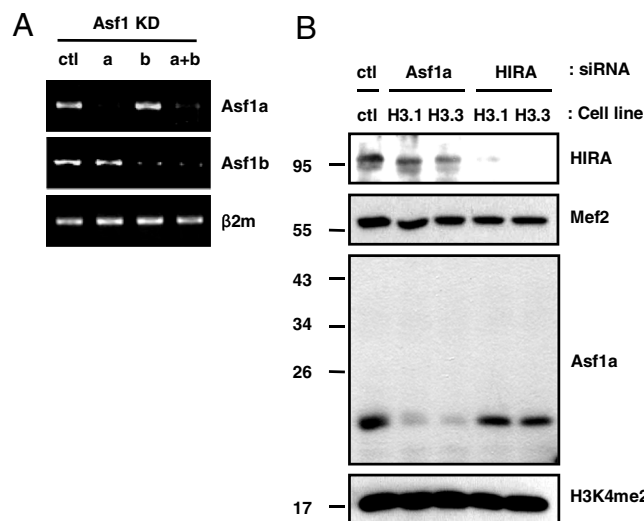

**Fig. 57.** RNA interference to target Asf1a/b or HIRA (A) Asf1a, Asf1b, or both were knocked down with specific siRNA or shRNA. C2C12 cells stably expressing control or Asf1b shRNA were constructed using the lentiviral RNAi system. These cells were used for siRNA transfection to target Asf1a. Isotype-specific knockdown efficiency was analyzed by semiquantitative RT-PCR. (B) eH3 C2C12 cells were transfected with siRNA targeting either Asf1a or HIRA (siRNA #1). Immunoblotting was performed to evaluate levels of the indicated proteins.

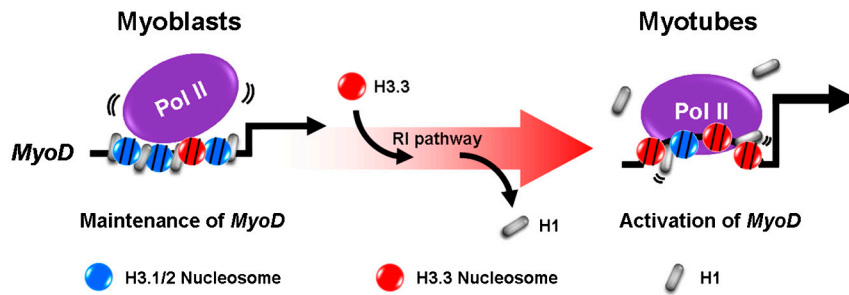

**Fig. S8.** A model for *MyoD* activation by RI histone deposition pathway. Repressive histone H1 binds CER and PRR to minimally maintain *MyoD* expression during myoblast proliferation. Upon differentiation, RI pathway actively mediates H3.3 deposition into regulatory regions of *MyoD* to drive *MyoD* activation with concomitant loss of H1.
